# Supplementary material for: Ndj1, a telomere-associated protein, regulates centrosome separation in budding yeast meiosis
Source: PubMed Central journal article supplement — J Cell Biol. 2015 Apr 27;209(2):247–59. doi: 10.1083/jcb.201408118 (PMC4411264; doi:10.1083/jcb.201408118), 2015-04-27
Supplement: supp_jcb.201408118_JCB_201408118_sm.pdf [file supp_jcb.201408118_JCB_201408118_sm.pdf]

Li et al., <http://www.jcb.org/cgi/content/full/jcb.201408118/DC1>

**Spc97-TAP purification**

|                   | Protein ID | Coverage (%) |         | Animal homologs |
|-------------------|------------|--------------|---------|-----------------|
|                   |            | Meiosis      | Mitosis |                 |
| γ-tubulin complex | Tub4       | 75           | 76      | TubG1           |
|                   | Spc97      | 66           | 65      | TUBGPC2         |
|                   | Spc98      | 55           | 62      | TUBGPC3         |
| Linkers           | Spc110     | 64           | 63      | Kendrin         |
|                   | Spc72      | 46           | 43      | TACC            |
|                   | Cmd1       | 88           | 97      | Calmodulin      |
| Core & satellite  | Nud1       | 58           | 58      | Centriolin      |
|                   | Spc42      | 67           | 69      |                 |
|                   | Spc29      | 61           | 64      |                 |
|                   | Cnm67      | 69           | 70      |                 |
| Half bridge       | Kar1       | 22           | 18      |                 |
|                   | Sfi1       | 20           | 12      | hSfi1           |
|                   | Cdc31      | 69           | 70      | Centrin3        |
|                   | Mps3       | 38           | 29      | SUN protein     |
| Membrane anchor   | Nbp1       | 41           | 46      |                 |
|                   | Bbp1       | 67           | 63      |                 |
|                   | Mps2       | 40           | 45      | KASH protein    |
|                   | Ndc1       | 27           | 24      |                 |
| Meiotic plaque    | Mpc54      | 55           | 0       |                 |
|                   | Spo21      | 30           | 0       |                 |
|                   | Ady3       | 14           | 0       |                 |
|                   | Spo74      | 15           | 0       |                 |
|                   | Don1       | 19           | 0       |                 |
| Others            | Bfa1       | 55           | 57      |                 |
|                   | Bub2       | 60           | 66      |                 |
|                   | Cdc5       | 3            | 25      | Polo kinase     |
|                   | Cdc14      | 55           | 55      | Cdc14           |
|                   | Cdc15      | 0            | 18      |                 |
|                   | Mlp2       | 0            | 3       |                 |
|                   | Ndj1       | 36           | 0       |                 |
|                   | Pom152     | 2            | 13      |                 |
|                   | Tub1       | 25           | 32      |                 |
|                   | Tub2       | 43           | 36      |                 |

Figure S1. **Extended list of peptides recovered by mass spectrometry of Spc97-TAP samples.** Known animal homologues are shown to the right of the list.

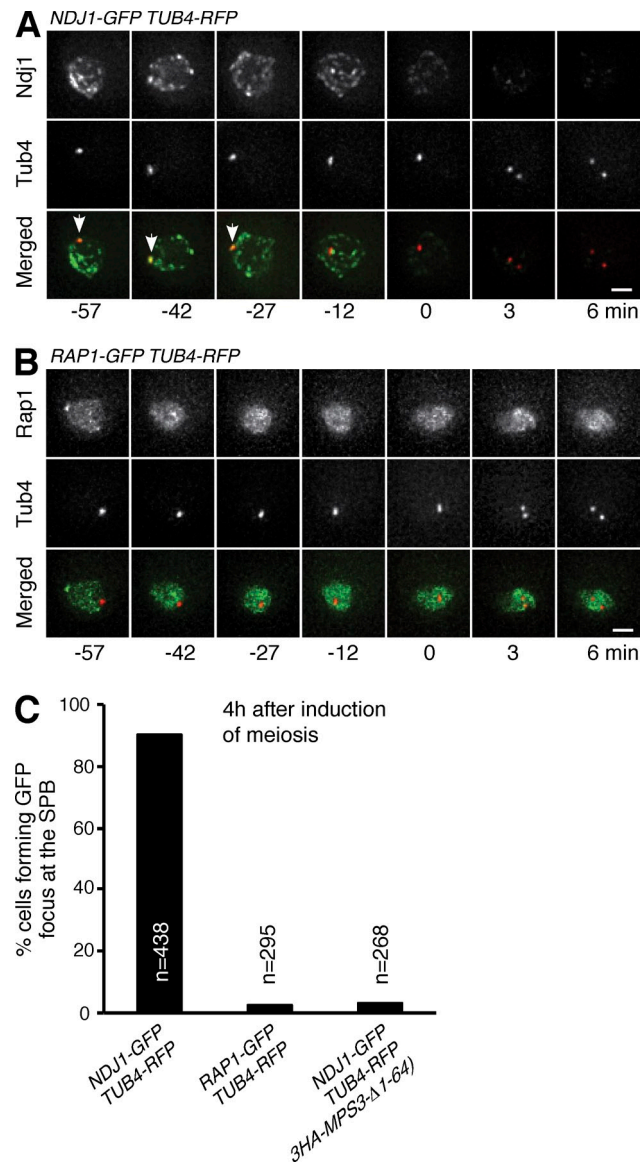

Figure S2. **Localization of Ndj1 and Rap1 in budding yeast meiosis.** Yeast cells were induced to undergo synchronous meiosis, and time-lapse fluorescence microscopy was performed as in Fig. 1 G. (A) Ndj1 dynamics during meiosis I. (B) Rap1 dynamics during meiosis I. (C) Quantification of Ndj1 and Rap1 localization during meiosis. Strains HY4086, HY4494, and HY4865 were used. Rap1-GFP and Ndj1-GFP are shown in green, Tub4-RFP in red. Bars, 2  $\mu$ m.

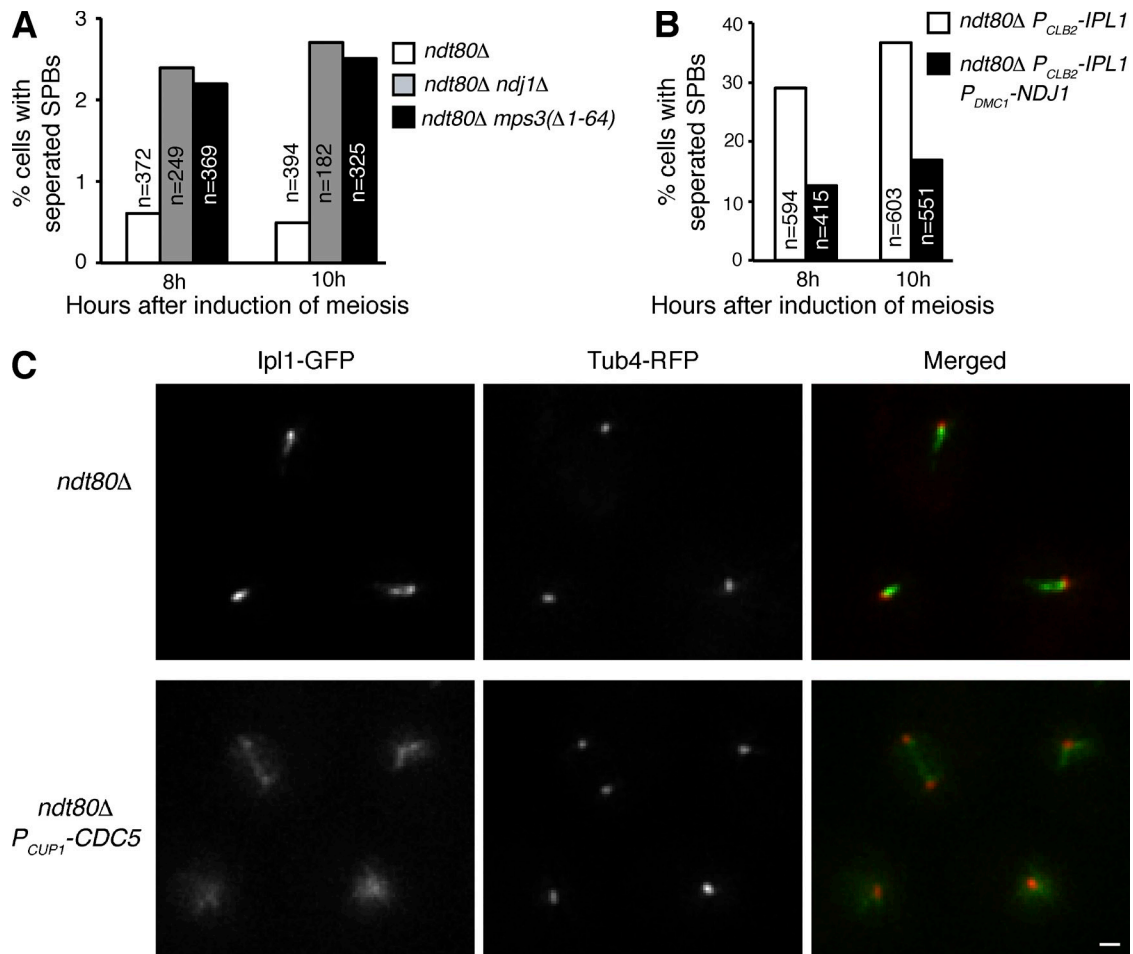

Figure S3. **Ndj1 and Cdc5 regulate SPB separation during yeast meiosis.** (A) SPB separation in cells arrested at prophase I by way of *ndt80Δ*. Yeast cells were induced to undergo synchronous meiosis, aliquots were withdrawn at indicated time points, and SPB separation was determined using fluorescence microscopy. SPB is marked by Tub4-RFP. (B) Overproduction of Ndj1 in cells arrested at prophase I but with Ipl1 depleted. Evaluation of SPB separation was performed as in A. Four copies of *P<sub>DMC1</sub>-NDJ1* were introduced in *ndt80Δ P<sub>CLB2</sub>-IPL1 P<sub>DMC1</sub>-NDJ1* cells. Strains used: HY4506 and HY4864. (C) Ectopic expression of *CDC5* promotes SPB separation. Yeast cells were induced to undergo synchronous meiosis, and then prepared for time-lapse fluorescence microscopy. Ipl1-GFP is shown in green; SPB, marked by Tub4-RFP, is shown in red. To induce *CDC5* expression, 60 mM  $\text{CuSO}_4$  was added to the culture media 4 h after induction of meiosis. Note that SPBs separated prematurely in the presence of Cdc5. Strains used: HY2459 and HY4877. Bar, 2  $\mu\text{m}$ .

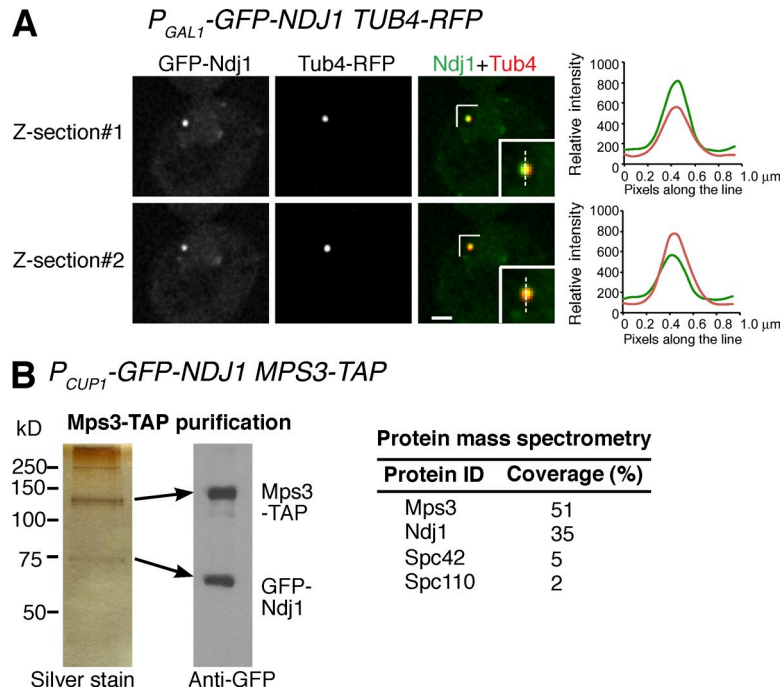

Figure S4. **Localization of Ndj1 and Tub4 in vegetative yeast cells.** (A) Fluorescence microscopy of GFP-Ndj1 and Tub4-RFP. Yeast cells (HY4128) were grown in synthetic complete medium with 3% galactose to induce the expression of  $P_{GAL1}$ -GFP-NDJ1. Two continuous optical sections are shown. Insets show 2 $\times$  magnification of the area of interest. GFP-Ndj1, green; Tub4-RFP, red. Bar, 2  $\mu\text{m}$ . A line scan of fluorescence intensity of GFP-Ndj1 and Tub4-RFP is shown to the right. Note that GFP-Ndj1 colocalizes with Tub4-RFP. The cell shown is from a single representative experiment out of four repeats;  $n > 50$ . (B) Ectopically produced Ndj1 binds to Mps3 in vegetative yeast cells. To produce Ndj1 at a lower protein level and therefore to generate viable cells, we used the  $P_{CUP1}$ -GFP-NDJ1 construct. Yeast cells (HY4254-B) were grown to mid log phase in the presence 50  $\mu\text{M}$   $\text{CuSO}_4$  and harvested for affinity protein purification as in Fig. 1 C. An anti-GFP antibody was used to probe GFP-Ndj1. This antibody also recognizes Mps3-TAP. Arrows point to the same protein bands determined by silver staining and immunoblotting. Representative peptides identified by protein mass spectrometry are shown in the table to the right.

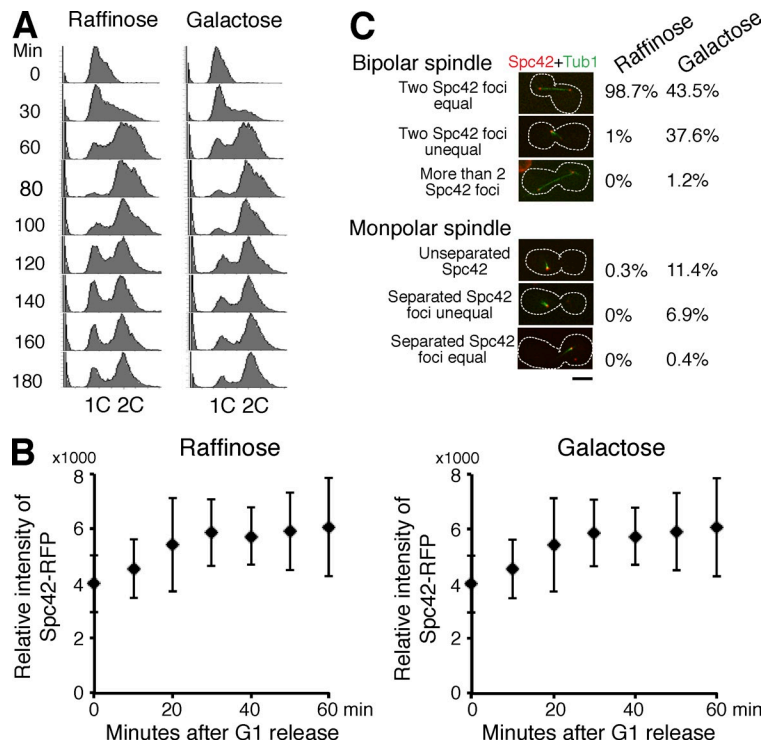

Figure S5. **Cell progression and SPB duplication in vegetative cells with ectopic expression of Ndj1.** Yeast cells grown in raffinose were arrested at G1 with alpha factor; addition of 3% galactose induced the expression of  $P_{GAL1}$ -*NDJ1* as shown in Fig. 5 D. (A and B) Cell aliquots were withdrawn at indicated times upon removal of the alpha factor and prepared for FACS (A) and fluorescence microscopy (B). Spc42 was tagged with RFP and used as an SPB marker. (A) FACS analysis of DNA synthesis. (B) The intensity of Spc42-RFP in vegetative yeast cells. (C) Spindle morphology in large budded yeast cells. Cells were divided into two major categories: with a bipolar spindle and with a monopolar spindle. Tub1, the  $\alpha$ -tubulin in yeast, was marked with GFP (green); Spc42 was marked with RFP (red). About 200 cells were counted for each treatment. Note that the percentage of cells for each category varies from that of Fig. 5 F, which indicates experimental variations of the  $P_{GAL1}$ -*NDJ1* expression level in vegetative yeast cells. Bar, 2  $\mu$ m.

Table S1. Yeast strains used in this study

| Name   | Background   | Genotype                                                                                                                                                                                                                                                                                                                     |
|--------|--------------|------------------------------------------------------------------------------------------------------------------------------------------------------------------------------------------------------------------------------------------------------------------------------------------------------------------------------|
| HY1635 | SK1, diploid | his3Δ200, leu2-k, ura3, TUB4-RFP::HIS5/ his3Δ200, leu2-k, ura3, TUB4-RFP::HIS5                                                                                                                                                                                                                                               |
| HY2459 | SK1, diploid | leu2, ura3, his3, IPL1-GFP::HIS5, TUB4-RFP::HIS5, ndt80Δ::KAN/leu2, ura3, his3, IPL1-GFP::HIS5, TUB4-RFP::HIS5, ndt80Δ::KAN                                                                                                                                                                                                  |
| HY3674 | SK1, diploid | his3Δ200, leu2-k, ura3, SPC97-TAP::HIS5, SPC72-GFP::HIS5/ his3Δ200, leu2-k, ura3, SPC97-TAP::HIS5, SPC72-GFP::HIS5                                                                                                                                                                                                           |
| HY3813 | SK1, diploid | his3Δ200, leu2-k, ura3, NDJ1-TAP::HIS5, MPS3-GFP::HIS5/ his3Δ200, leu2-k, ura3, NDJ1-TAP::HIS5, MPS3-GFP::HIS5                                                                                                                                                                                                               |
| HY3848 | SK1, diploid | his3Δ200, leu2-k, ura3, NDJ1-3HA::HIS5, MPS3-TAP::HIS5/ his3Δ200, leu2-k, ura3, NDJ1-3HA::HIS5, MPS3-TAP::HIS5                                                                                                                                                                                                               |
| HY3859 | SK1, diploid | his3Δ200, leu2-k, ura3, NDJ1-GFP::HIS5, SPC42-RFP::HIS5/ his3Δ200, leu2-k, ura3, NDJ1-GFP::HIS5, SPC42-RFP::HIS5                                                                                                                                                                                                             |
| HY3871 | SK1, diploid | his3Δ200, leu2-k, ura3, lys2, ho::LYS2, MPS3-3HA::HIS5/ his3Δ200, leu2-k, ura3, lys2, ho::LYS2, MPS3-3HA::HIS5                                                                                                                                                                                                               |
| HY3881 | SK1, diploid | his3Δ200, leu2-k, ura3, NDJ1-GFP::HIS5, MPS3-RFP::HIS5/ his3Δ200, leu2-k, ura3, NDJ1-GFP::HIS5, MPS3-RFP::HIS5                                                                                                                                                                                                               |
| HY3911 | SK1, diploid | his3Δ200, leu2-k, ura3, P <sub>CLB2</sub> -3HA-MPS3::NAT, NDJ1-GFP::HIS5, SPC42-RFP::HIS5/ his3Δ200, leu2-k, ura3, P <sub>CLB2</sub> -3HA-MPS3::NAT, NDJ1-GFP::HIS5, SPC42-RFP::HIS5                                                                                                                                         |
| HY3937 | SK1, diploid | his3Δ200, leu2-k, ura3, lys2, ho::LYS2, NDJ1-3HA::HIS5, MPS3-V5::HIS5/ his3Δ200, leu2-k, ura3, lys2, ho::LYS2, NDJ1-3HA::HIS5, MPS3-V5::HIS5                                                                                                                                                                                 |
| HY3945 | SK1, diploid | his3Δ200, leu2-k, ura3, ndj1Δ::HB, TUB4-RFP::HIS5/ his3Δ200, leu2-k, ura3, ndj1Δ::HB, TUB4-RFP::HIS5                                                                                                                                                                                                                         |
| HY3973 | SK1, diploid | ura3, leu2, MPS3-V5::His5, ndt80 Δ::KAN, NDJ1-3HA::HIS5/ ura3, leu2, MPS3-V5::HIS5, ndt80 Δ:: KAN, NDJ1-3HA::HIS5                                                                                                                                                                                                            |
| HY4031 | SK1, diploid | ura3, leu2, P <sub>CLB2</sub> -CDC20:: KAN, NDJ1-3HA::HIS5, MPS3-V5::HIS5/ ura3, leu2, P <sub>CLB2</sub> -CDC20:: KAN, NDJ1-3HA::HIS5, MPS3-V5::HIS5                                                                                                                                                                         |
| HY4074 | SK1, diploid | his3Δ200, leu2-k, ura3, lys2, ho::LYS2, NDJ1-3HA::HIS5, P <sub>CUP1</sub> -CDC5::KAN, ndt80Δ::KAN/his3Δ200, leu2-k, ura3, lys2, ho::LYS2, NDJ1-3HA::HIS5, P <sub>CUP1</sub> -CDC5::KAN, ndt80Δ::KAN                                                                                                                          |
| HY4086 | SK1, diploid | his3Δ200, leu2-k, ura3, NDJ1-GFP::HIS5, TUB4-RFP::HIS5/ his3Δ200, leu2-k, ura3, NDJ1-GFP::HIS5, TUB4-RFP::HIS5                                                                                                                                                                                                               |
| HY4113 | SK1, diploid | his3Δ200, leu2-k, ura3, NDJ1-GFP::HIS5, TUB4-RFP::HIS5, P <sub>CLB2</sub> -CDC20:: KAN/ his3Δ200, leu2-k, ura3, NDJ1-GFP::HIS5, TUB4-RFP::HIS5, P <sub>CLB2</sub> -CDC20:: KAN                                                                                                                                               |
| HY4115 | SK1, diploid | his3Δ200, leu2-k, ura3, NDJ1-GFP::HIS5, TUB4-RFP::HIS5, ndt80::KAN/ his3Δ200, leu2-k, ura3, NDJ1-GFP::HIS5, TUB4-RFP::HIS5, ndt80::KAN                                                                                                                                                                                       |
| HY4133 | SK1, diploid | his3Δ200, leu2-k, ura3, spo11Δ::HB, TUB4-RFP::HIS5/ his3Δ200, leu2-k, ura3, spo11Δ::HB, TUB4-RFP::HIS5                                                                                                                                                                                                                       |
| HY4204 | SK1, diploid | his3Δ200, leu2-k, ura3, ndj1Δ::HB, spo11Δ::HB, TUB4-RFP::HIS5/ his3Δ200, leu2-k, ura3, ndj1Δ::HB, spo11Δ::HB, TUB4-RFP::HIS5                                                                                                                                                                                                 |
| HY4383 | SK1, diploid | arg4, leu2, TUB4-RFP::HIS5, ura3::pGPD1-GAL4(848).ER::URA3, PGAL1-GFP-CSM4::LEU2 (pHG345)/arg4, leu2, TUB4-RFP::HIS5, ura3::pGPD1-GAL4(848).ER::URA3, PGAL1-GFP-CSM4::LEU2                                                                                                                                                   |
| HY4393 | SK1, diploid | his3Δ200, leu2-k, ura3, lys2, ho::LYS2, NDJ1-3HA::HIS5, MPS3-V5::HIS5/ his3Δ200, leu2-k, ura3, lys2, ho::LYS2, NDJ1-TAP::HIS5, MPS3-V5::HIS5                                                                                                                                                                                 |
| HY4412 | SK1, diploid | his3Δ200, leu2-k, ura3, lys2, ho::LYS2, NDJ1-3HA::HIS5, KAN::P <sub>CUP1</sub> -MPS3(Δ1-64)-V5::HIS5/ his3Δ200, leu2-k, ura3, lys2, ho::LYS2, NDJ1-3HA::HIS5, KAN::P <sub>CUP1</sub> -MPS3(Δ1-64)-V5::HIS5                                                                                                                   |
| Hy4418 | SK1, diploid | his3Δ200, leu2-k, ura3, MPS3-GFP::HIS5, TUB4-RFP::HIS5/ his3Δ200, leu2-k, ura3, MPS3-GFP::HIS5, TUB4-RFP::HIS5                                                                                                                                                                                                               |
| HY4419 | SK1, diploid | his3Δ200, leu2-k, ura3, MPS3-GFP::HIS5, TUB4-RFP::HIS5, ndj1Δ::HB / his3Δ200, leu2-k, ura3, MPS3-GFP::HIS5, TUB4-RFP::HIS5, ndj1Δ::HB                                                                                                                                                                                        |
| HY4494 | SK1, diploid | his3Δ200, leu2-k, ura3, lys2, ho::LYS2, RAP1-GFP::HIS5, TUB4-RFP::HIS5/ his3Δ200, leu2-k, ura3, lys2, ho::LYS2, RAP1-GFP::HIS5, TUB4-RFP::HIS5                                                                                                                                                                               |
| HY4506 | SK1, diploid | ura3, leu2, his4, P <sub>CLB2</sub> -IPL1::KAN, NDJ1-3HA::HIS5, ndt80Δ::HB/ura3, leu2, his4, P <sub>CLB2</sub> -IPL1::KAN, NDJ1-3HA::HIS5, ndt80Δ::HB                                                                                                                                                                        |
| HY4654 | SK1, diploid | his4, P <sub>CLB2</sub> -IPL1::KAN, TUB4-RFP::HIS5, ndt80Δ::HB, P <sub>DMC1</sub> -GFP-NDJ1::LEU2, P <sub>DMC1</sub> -GFP-NDJ1::URA3/his4, P <sub>CLB2</sub> -IPL1::KAN, TUB4-RFP::HIS5, ndt80Δ::HB, P <sub>DMC1</sub> -GFP-NDJ1::LEU2, P <sub>DMC1</sub> -GFP-NDJ1::URA3                                                    |
| HY4803 | SK1, diploid | his3Δ200, leu2-k, ura3, P <sub>CUP1</sub> -CDC5::KAN, ndt80Δ::KAN, TUB4-RFP::HIS5, P <sub>DMC1</sub> -GFP-NDJ1::LEU2, P <sub>DMC1</sub> -GFP-NDJ1::URA3/ his3Δ200, leu2-k, ura3, P <sub>CUP1</sub> -CDC5::KAN, ndt80Δ::KAN, TUB4-RFP::HIS5, P <sub>DMC1</sub> -GFP-NDJ1::LEU2, P <sub>DMC1</sub> -GFP-NDJ1::URA3             |
| HY4852 | SK1, diploid | his3Δ200, leu2-k, ura3, NDJ1-GFP::HIS5, TUB4-RFP::HIS5, csm4Δ::HB / his3Δ200, leu2-k, ura3, NDJ1-GFP::HIS5, TUB4-RFP::HIS5, csm4Δ::HB                                                                                                                                                                                        |
| HY4860 | SK1, diploid | his3Δ200, leu2-k, ura3, TUB4-RFP::HIS5, P <sub>DMC1</sub> -GFP-NDJ1(pHG286)::LEU2, P <sub>DMC1</sub> -GFP-NDJ1::URA3/ his3Δ200, leu2-k, ura3, TUB4-RFP::HIS5, P <sub>DMC1</sub> -GFP-NDJ1::LEU2, P <sub>DMC1</sub> -GFP-NDJ1::URA3                                                                                           |
| HY4861 | SK1, diploid | his3Δ200, leu2-k, ura3, spo11Δ::HB, TUB4-RFP::HIS5, P <sub>DMC1</sub> -GFP-NDJ1::LEU2, P <sub>DMC1</sub> -GFP-NDJ1::URA3/ his3Δ200, leu2-k, ura3, spo11Δ::HB, TUB4-RFP::HIS5, P <sub>DMC1</sub> -GFP-NDJ1::LEU2, P <sub>DMC1</sub> -GFP-NDJ1::URA3                                                                           |
| HY4864 | SK1, diploid | his3Δ200, leu2-k, ura3, spo11Δ::HB, P <sub>CUP1</sub> -MPS3(Δ1-64)::KAN, TUB4-RFP::HIS5/ his3Δ200, leu2-k, ura3, spo11Δ::HB, P <sub>CUP1</sub> -MPS3(Δ1-64)::KAN, TUB4-RFP::HIS5                                                                                                                                             |
| HY4865 | SK1, diploid | his3Δ200, leu2-k, ura3, spo11Δ::HB, P <sub>CUP1</sub> -MPS3(Δ1-64)::KAN, TUB4-RFP::HIS5, P <sub>DMC1</sub> -GFP-NDJ1::LEU2, P <sub>DMC1</sub> -GFP-NDJ1::URA3/ his3Δ200, leu2-k, ura3, spo11Δ::HB, P <sub>CUP1</sub> -MPS3(Δ1-64)::KAN, TUB4-RFP::HIS5, P <sub>DMC1</sub> -GFP-NDJ1::LEU2, P <sub>DMC1</sub> -GFP-NDJ1::URA3 |

Table S1. **Yeast strains used in this study** (Continued)

| Name     | Background   | Genotype                                                                                                                                                                                        |
|----------|--------------|-------------------------------------------------------------------------------------------------------------------------------------------------------------------------------------------------|
| HY4254-B | SK1, haploid | MAT $\alpha$ , his3 $\Delta$ 200, leu2-k, ura3, lys2, ho::LYS2, MPS3-TAP::HIS5, P <sub>CUP1</sub> -GFP-NDJ1::LEU2                                                                               |
| HY4877   | SK1, diploid | leu2, ura3, his3, IPL1-GFP::HIS5, TUB4-RFP::HIS5, ndt80 $\Delta$ ::KAN, P <sub>CUP1</sub> -CDC5/leu2, ura3, his3, IPL1-GFP::HIS5, TUB4-RFP::HIS5, ndt80 $\Delta$ ::KAN, P <sub>CUP1</sub> -CDC5 |
| HY3799   | S288C        | MAT $\alpha$ , his3 $\Delta$ 1, leu2 $\Delta$ , met15 $\Delta$ , ura3 $\Delta$ , TUB4-RFP::HIS5                                                                                                 |
| HY4128   | S288C        | MAT $\alpha$ , his3 $\Delta$ 1, leu2 $\Delta$ 0, met15 $\Delta$ 0, ura3 $\Delta$ 0, TUB4-RFP::HIS5, P <sub>GALI</sub> -GFP-NDJ1::LEU2                                                           |
| HY4149   | S288C        | MAT $\alpha$ , P <sub>CLB2</sub> -MPS3( $\Delta$ 1-64)::KAN, his3 $\Delta$ 1, leu2 $\Delta$ , met15 $\Delta$ , ura3 $\Delta$ , TUB4-RFP::HIS5                                                   |
| HY4150   | S288C        | MAT $\alpha$ , P <sub>CLB2</sub> -MPS3( $\Delta$ 1-64)::KAN, his3 $\Delta$ 1, leu2 $\Delta$ 0, met15 $\Delta$ 0, ura3 $\Delta$ 0, TUB4-RFP::HIS5, P <sub>GALI</sub> -GFP-NDJ1::LEU2             |
| HY4179   | S288C        | MAT $\alpha$ , his3 $\Delta$ 1, leu2 $\Delta$ 0, met15 $\Delta$ 0, ura3 $\Delta$ 0, P <sub>GALI</sub> -GFP-NDJ1::LEU2, MPS3-RFP::HIS5                                                           |
| HY4217   | S288C        | MAT $\alpha$ , his3 $\Delta$ 1, leu2 $\Delta$ 0, met15 $\Delta$ 0, ura3 $\Delta$ 0, P <sub>GALI</sub> -GFP-NDJ1::LEU2, RAP1-RFP::HIS5                                                           |
| HY4249-A | S288C        | MAT $\alpha$ , his3 $\Delta$ 1, leu2 $\Delta$ 0, met15 $\Delta$ 0, ura3 $\Delta$ 0, HTA1-RFP::HIS5, P <sub>GALI</sub> -GFP-NDJ1::LEU2                                                           |
| HY4376   | S288C        | MAT $\alpha$ , leu2 $\Delta$ 0, met15 $\Delta$ 0, ura3 $\Delta$ 0, his3 $\Delta$ 1::SPC42-RFP::HIS5, TUB1-GFP::HIS5, P <sub>GALI</sub> -V5-NDJ1::URA3                                           |
| HY4933   | S288C        | his3 $\Delta$ 1, leu2 $\Delta$ 0, lys2 $\Delta$ 0, ura3 $\Delta$ 0, pom152 $\Delta$ ::KAN, P <sub>GALI</sub> -GFP-NDJ1::LEU2                                                                    |
| HY4947   | S288C        | his3 $\Delta$ 1, leu2 $\Delta$ 0, met15 $\Delta$ 0, ura3 $\Delta$ 0, TUB4-RFP::HIS5, P <sub>GALI</sub> -GFP-NDJ1::LEU2, pom152 $\Delta$ ::KAN                                                   |

Table S2. **Plasmids used in this study**

| Plasmid | Description                       |
|---------|-----------------------------------|
| pHG274  | P <sub>CUP1</sub> -GFP-NDJ, LEU2  |
| pHG286  | P <sub>DMC1</sub> -GFP-NDJ1, LEU2 |
| pHG302  | P <sub>GAL</sub> -GFP-NDJ1, LEU2  |
| pHG335  | P <sub>GAL</sub> -V5-NDJ1, URA3   |
| pHG389  | P <sub>DMC1</sub> -GFP-NDJ1, URA3 |

Table S3. **Spore viability in selected yeast strains**

| Strains                     | Spore viability |
|-----------------------------|-----------------|
| Untagged wild type          | 100%            |
| HY3859: NDJ1-GFP, SPC42-RFP | 97.9%           |
| HY3881: NDJ1-GFP, MPS3-RFP  | 95.8%           |
| HY4086: NDJ1-GFP, TUB4-RFP  | 96.4%           |
| HY4418: MPS3-GFP, TUB4-RFP  | 95.8%           |
| GHY4494: RAP1-GFP, TUB4-RFP | 96.2%           |
